# Supplementary material for: Green valorisation of biowastes – electrochemical “one-pot” reductive amination of furfural on a graphite electrode in water
Source: Royal Society of Chemistry journal article supplement (doi:10.1039/d5va00335k), 2026-01-01
Supplement: d5va00335k1.pdf [file d5va00335k1.pdf]

## Supporting Information

for the article

### Green Valorisation of Bio-wastes – Electrochemical "One-pot" Reductive Amination of Furfural on Graphite Electrode in Water

Joel Donkeng-Dazie<sup>a,\*</sup>, Lucie Koláčná<sup>b</sup>, Martin Lamač<sup>b</sup>, Jiří Ludvík<sup>b,\*</sup>

<sup>a</sup> Department of Material Engineering, School of Chemical Engineering and Mineral Industries, University of Ngaoundere, P.O. Box 454, Ngaoundere, Cameroon; E-mail: joel.donkeng@yahoo.fr

<sup>b</sup> Department of Molecular Electrochemistry and Catalysis, J. Heyrovský Institute, Czech Acad. of Sci., Dolejškova 3, 18223 Prague 8, Czechia; E-mail: jiri.ludvik@jh-inst.cas.cz

\* corresponding author

#### 1. NMR spectra of the reaction mixtures

##### 1.1 Working potential dependence

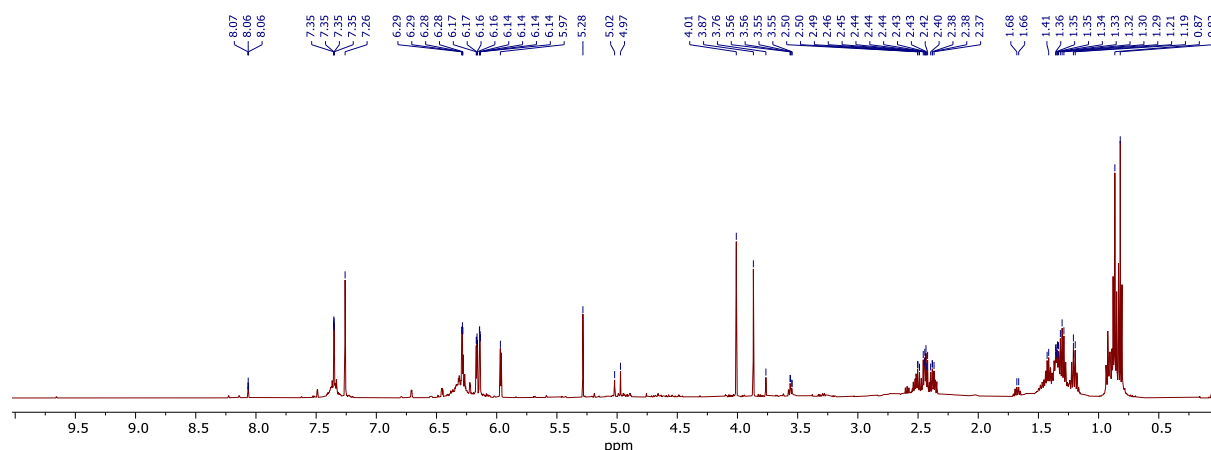

Fig S1. <sup>1</sup>H NMR spectrum of the isolated reaction mixture from the electroreductive amination of FF with *n*-BuNH<sub>2</sub> at pH 11, potential –1.7 V.

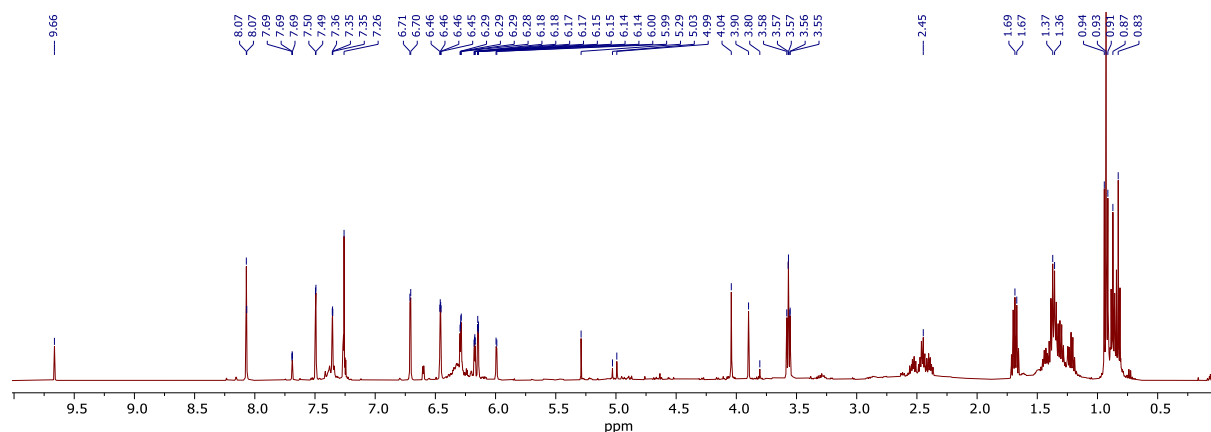

Fig S2.  $^1\text{H}$  NMR spectrum of the isolated reaction mixture from the electroreductive amination of FF with  $n\text{-BuNH}_2$  at pH 11, potential  $-1.6\text{ V}$ .

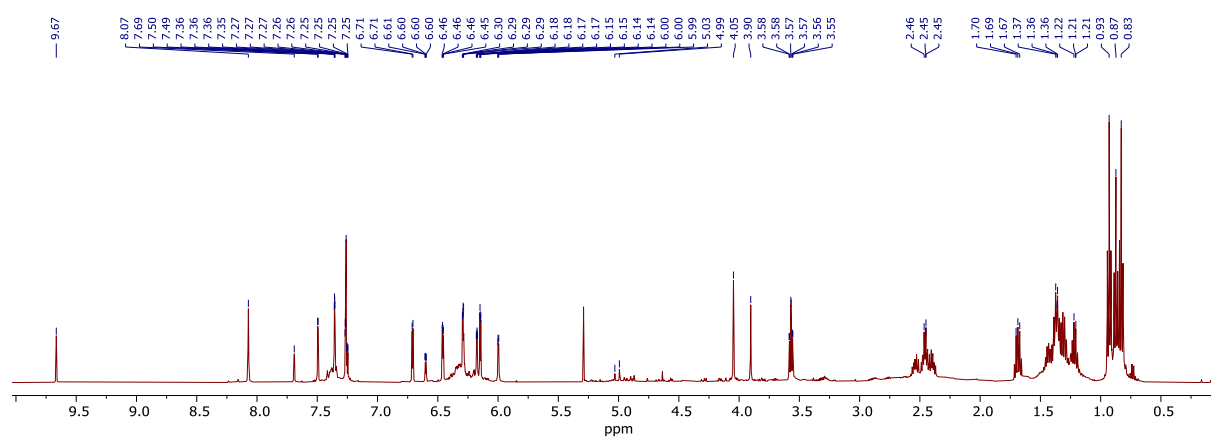

Fig S3.  $^1\text{H}$  NMR spectrum of the isolated reaction mixture from the electroreductive amination of FF with  $n\text{-BuNH}_2$  at pH 11, potential  $-1.5\text{ V}$ .

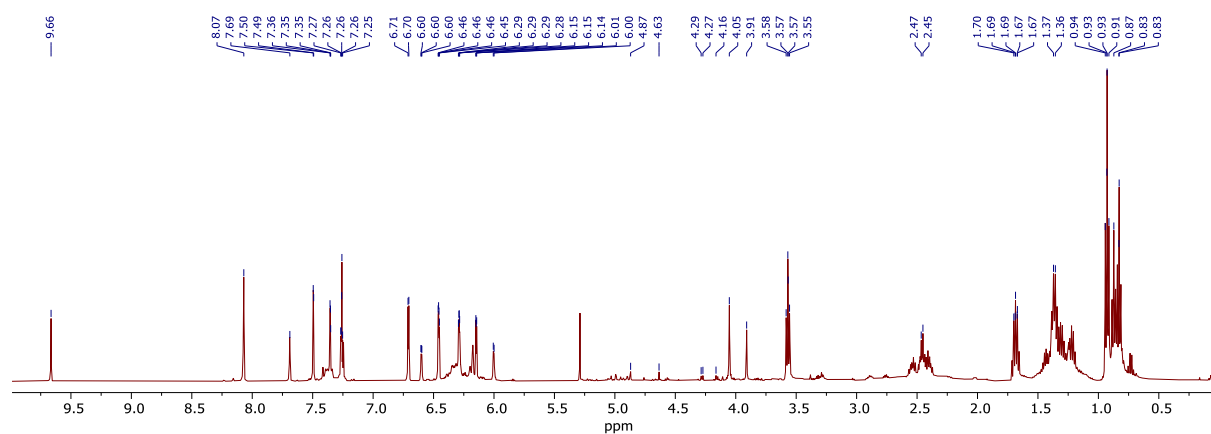

Fig S4.  $^1\text{H}$  NMR spectrum of the isolated reaction mixture from the electroreductive amination of FF with  $n\text{-BuNH}_2$  at pH 11, potential  $-1.4\text{ V}$ .

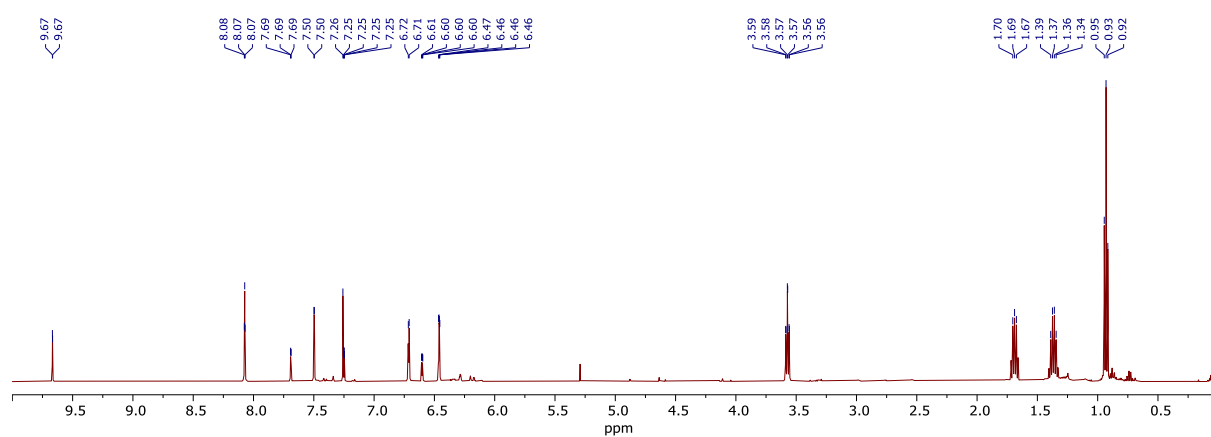

Fig S5.  $^1\text{H}$  NMR spectrum of the isolated reaction mixture from the electroreductive amination of FF with  $n\text{-BuNH}_2$  at pH 11, potential  $-1.3$  V.

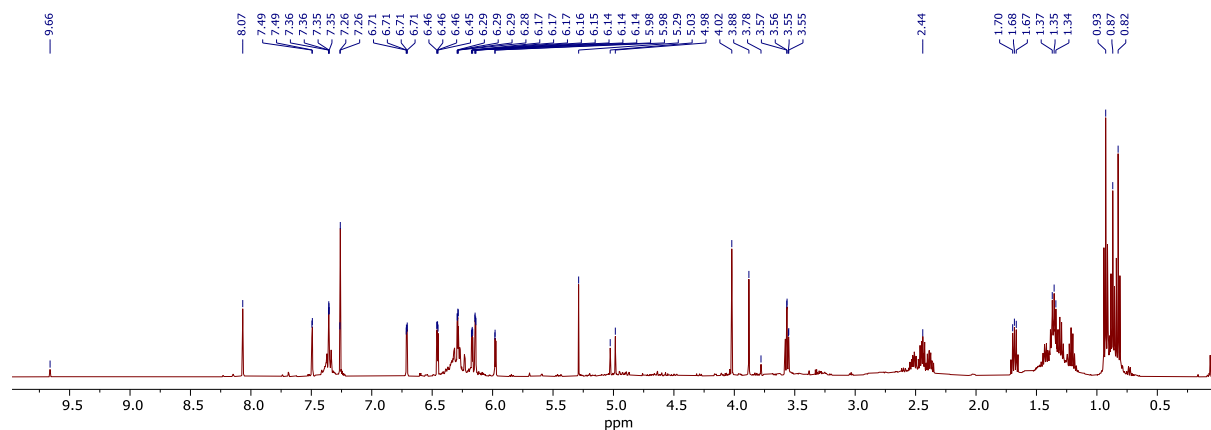

Fig S6.  $^1\text{H}$  NMR spectrum of the isolated reaction mixture from the electroreductive amination of FF with  $n\text{-BuNH}_2$  at pH 7.5, potential  $-1.7$  V.

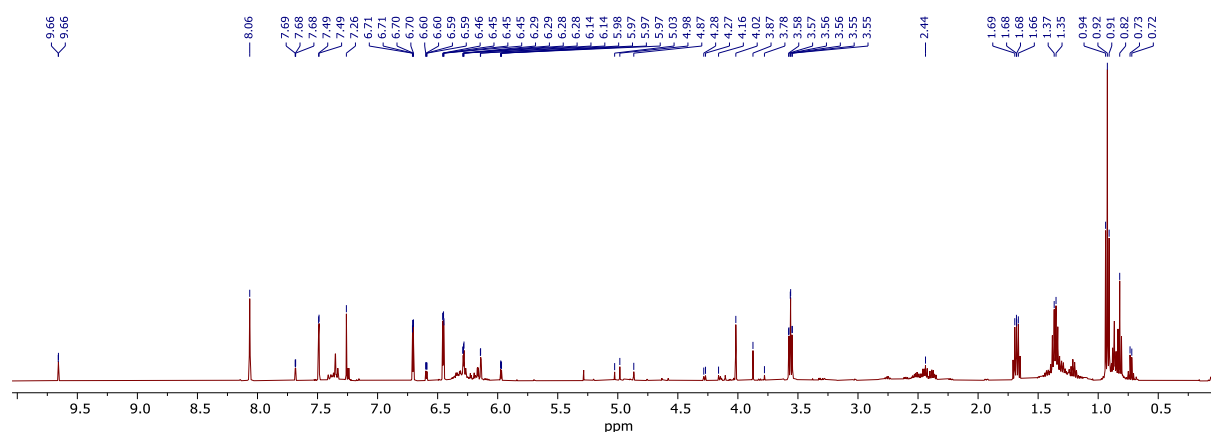

Fig S7.  $^1\text{H}$  NMR spectrum of the isolated reaction mixture from the electroreductive amination of FF with  $n\text{-BuNH}_2$  at pH 7.5, potential  $-1.6$  V.

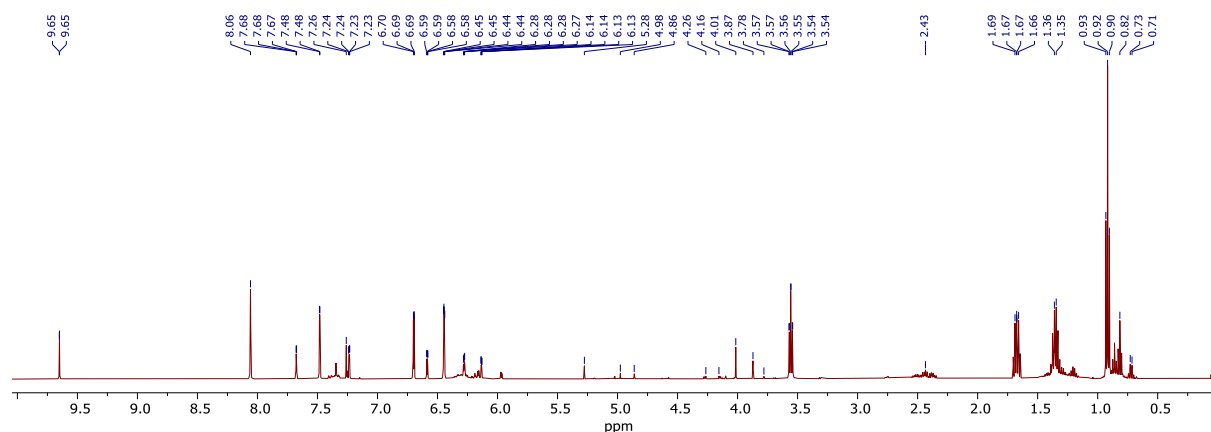

Fig S8.  $^1\text{H}$  NMR spectrum of the isolated reaction mixture from the electroreductive amination of FF with  $n\text{-BuNH}_2$  at pH 7.5, potential  $-1.5$  V.

**1.2 pH dependence (at potential  $-1.7$  V)**

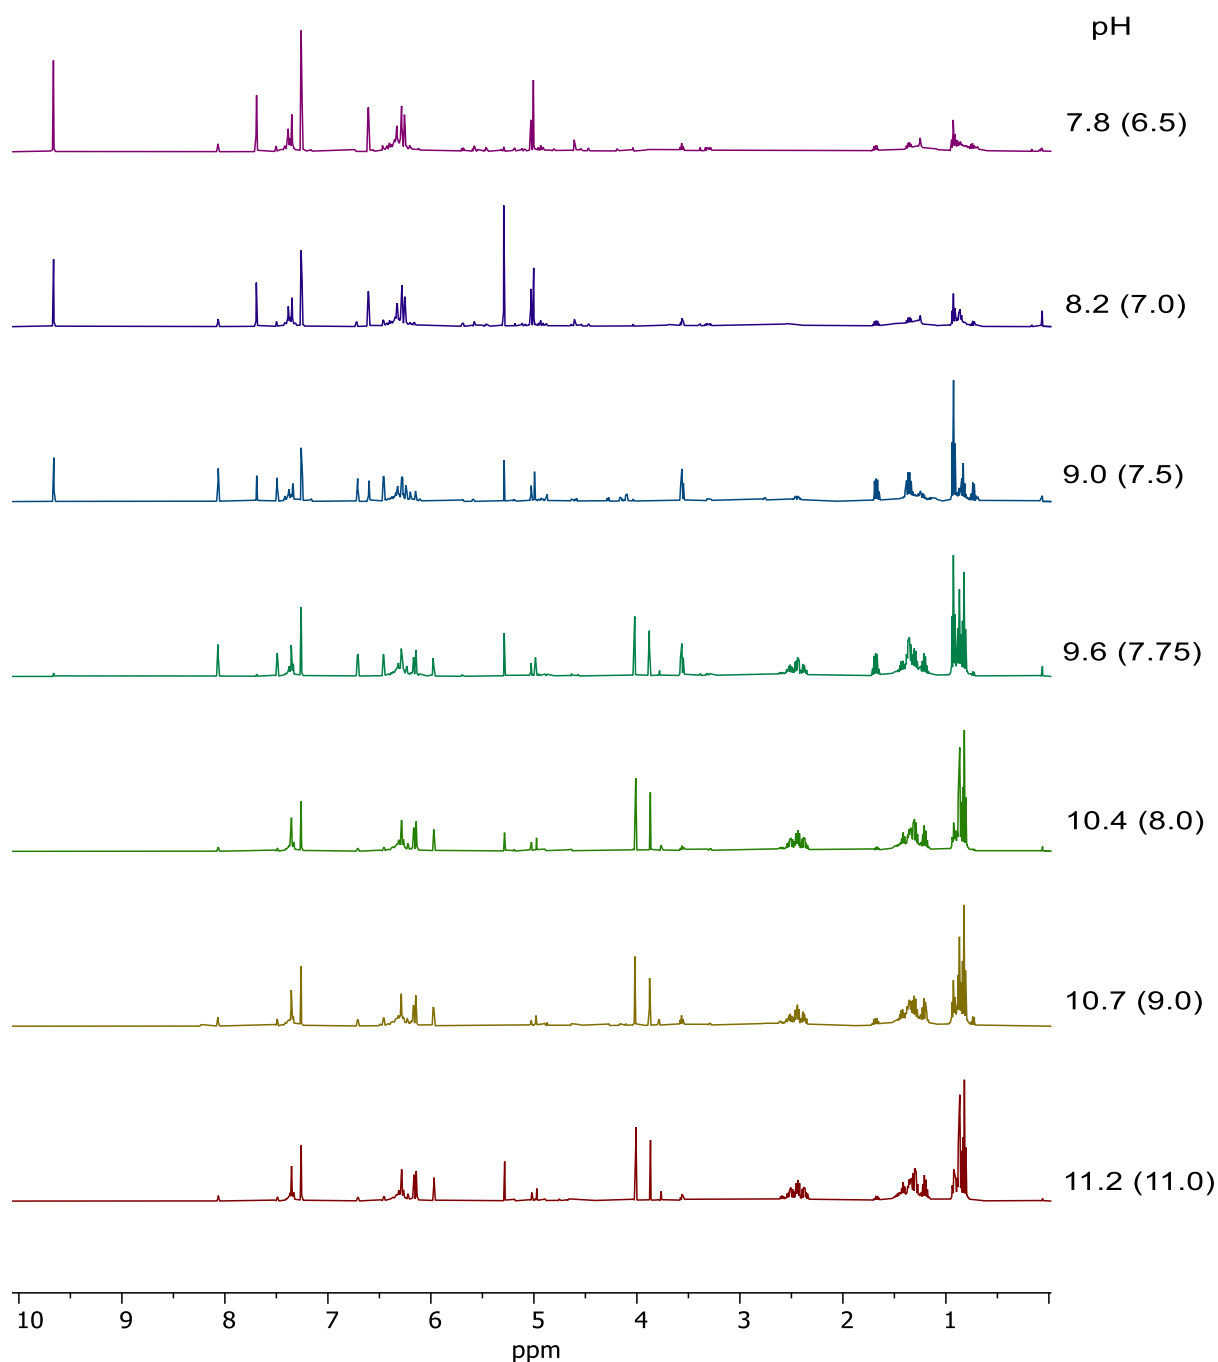

Fig S9.  $^1\text{H}$  NMR spectra of the isolated reaction mixtures from the electroreductive amination of FF with  $n\text{-BuNH}_2$  at various pH (measured pH and pH of the initial phosphate electrolyte in parenthesis).

### 1.3 Electroreduction using various amines (at potential $-1.7$ V, pH 11)

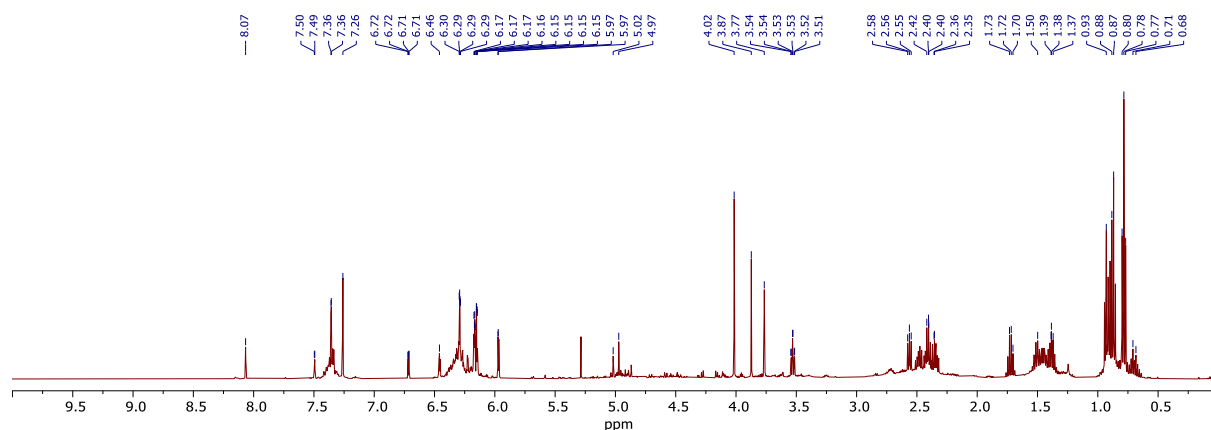

Fig S10.  $^1\text{H}$  NMR spectrum of the isolated reaction mixture from the electroreductive amination of FF with  $n\text{-PrNH}_2$ .

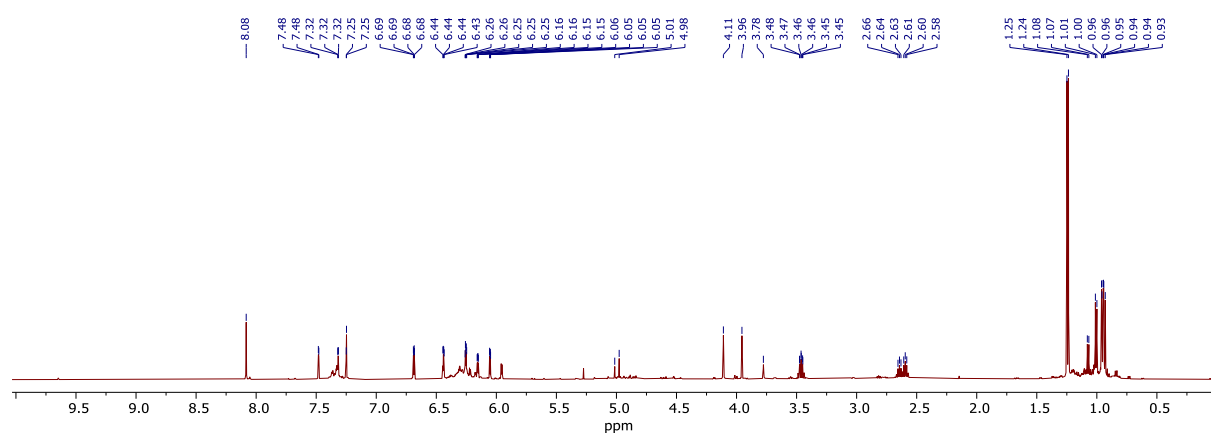

Fig S11.  $^1\text{H}$  NMR spectrum of the isolated reaction mixture from the electroreductive amination of FF with  $i\text{-PrNH}_2$ .

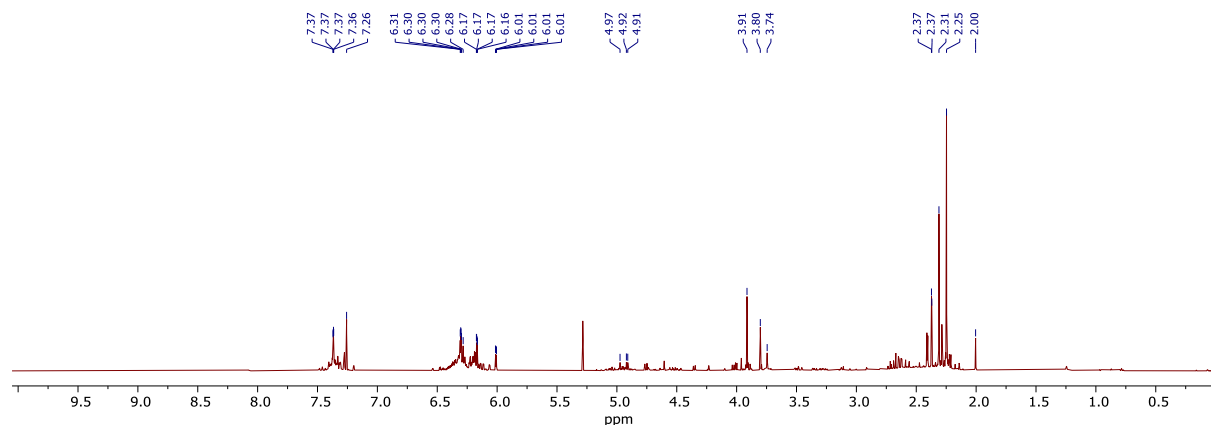

Fig S12.  $^1\text{H}$  NMR spectrum of the isolated reaction mixture from the electroreductive amination of FF with  $\text{MeNH}_2$ .

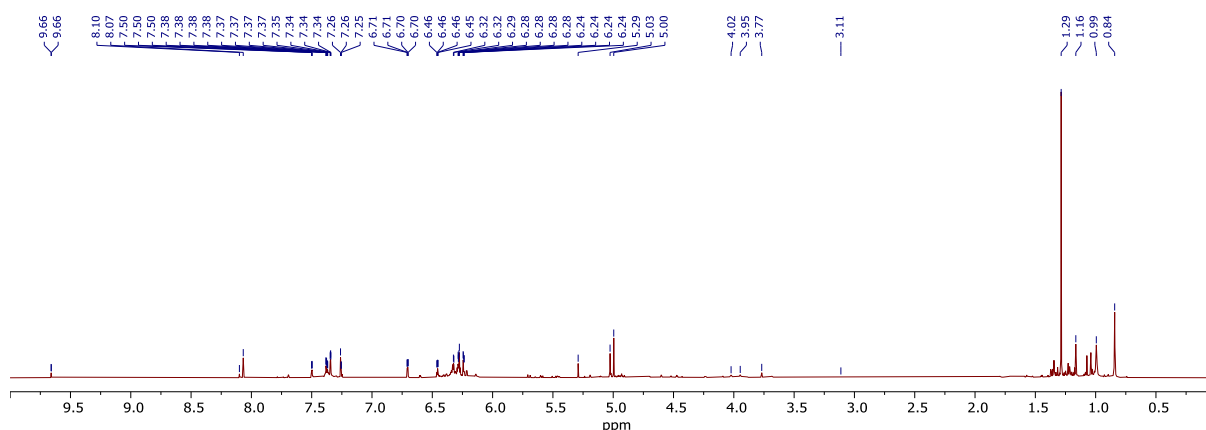

Fig S13.  $^1\text{H}$  NMR spectrum of the isolated reaction mixture from the electroreductive amination of FF with  $t\text{-BuNH}_2$ .

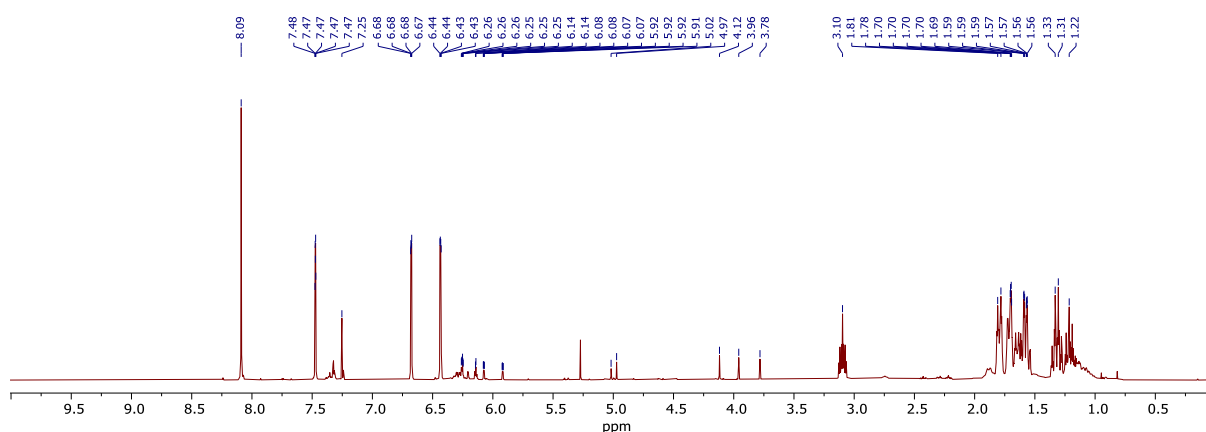

Fig S14.  $^1\text{H}$  NMR spectrum of the isolated reaction mixture from the electroreductive amination of FF with  $\text{cy-HxNH}_2$ .

## 2. Isolation of the diamine product 4a

Crude products of electrolysis of FF with  $n\text{BuNH}_2$  were purified by column chromatography on silicagel using  $n\text{-Hx}/\text{AcOEt}/\text{NEt}_3$  5:1:0.1 as an eluent. A red oil was obtained: 34 mg (56 % yield based on FF) as a mixture of *rac*- and *meso*-**4a** in ratio ca. 1.1:1.

Data for **4a**: NMR ( $\text{CDCl}_3$ , 500 MHz)  $^1\text{H}$ :  $\delta$  0.83 (t,  $^3J = 7.2$  Hz, 6H,  $2\times\text{Me}$  of *rac*-), 0.87 (t,  $^3J = 7.2$  Hz, 6H,  $2\times\text{Me}$  of *meso*-), 1.18–1.47 (m, 16H,  $4\times\text{CH}_2$  of both isomers), 2.46 (m, 8H,  $2\times\text{CH}_2$  of both isomers), 3.90 (s, 1H,  $\text{CH-N}$  of *meso*-), 4.05 (s, 1H,  $\text{CH-N}$  of *rac*-), 6.00 (d,  $^3J = 3.2$  Hz, 1H,  $\text{C}^2\text{H}$  of *meso*-), 6.15 (dd,  $^3J = 3.2$  Hz,  $^4J = 0.8$  Hz, 1H,  $\text{C}^2\text{H}$  of *rac*-), 6.17 (dd,  $^3J = 3.2$  Hz,  $^3J = 1.8$  Hz, 1H,  $\text{C}^3\text{H}$  of *meso*-), 6.29 (dd,  $^3J = 3.2$  Hz,  $^3J = 1.8$  Hz, 1H,  $\text{C}^3\text{H}$  of *rac*-), 7.27 (dd,  $^3J = 1.8$  Hz,  $^4J = 0.8$  Hz, 1H,  $\text{C}^4\text{H}$  of *meso*-), 7.36 (dd,  $^3J = 1.8$  Hz,  $^4J = 0.8$  Hz, 1H,  $\text{C}^4\text{H}$  of *rac*-) ppm;  $^{13}\text{C}\{^1\text{H}\}$ :  $\delta$  14.05, 14.10 ( $2\times\text{Me}$ ), 20.37, 20.54, 32.10, 32.30 ( $4\times\text{CH}_2$ ), 47.33, 47.52 ( $2\times\text{CH}_2\text{-N}$ ), 59.94, 60.46 ( $2\times\text{CH-N}$ ), 107.45, 108.28, 109.86, 110.06 ( $4\times\text{C}^2, \text{C}^3$ ), 141.53, 142.02 ( $2\times\text{C}^4$ ), 154.5 ( $\text{C}^1$ ) ppm. Anal. calcd. for  $\text{C}_{18}\text{H}_{28}\text{O}_2\text{N}_2$  ( $M_r = 304.43$ ): C 71.02, H 9.27, N 9.20 %. Found: C 70.91, H 9.30, N 9.15 %.

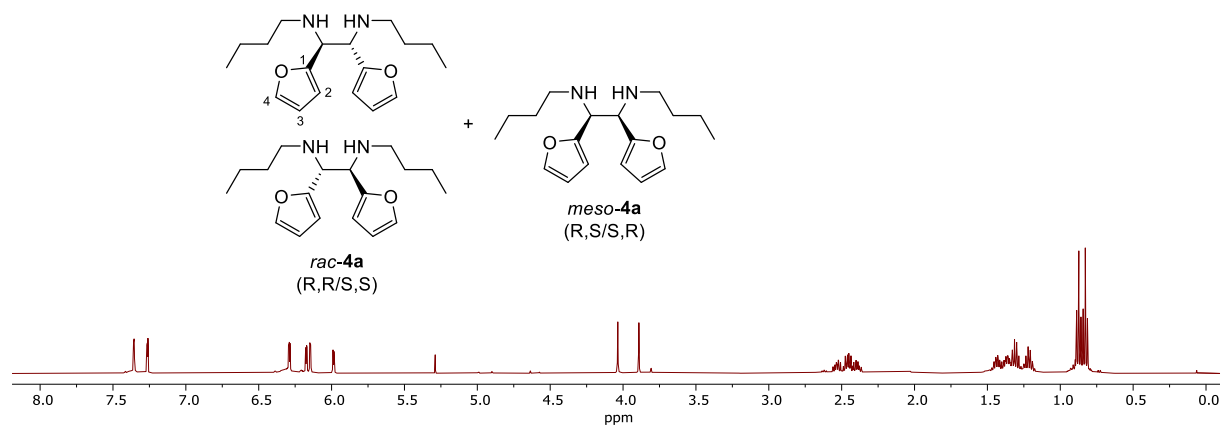

Fig S15.  $^1\text{H}$  NMR in  $\text{CDCl}_3$  of **4a** purified by column chromatography on  $\text{SiO}_2$  ( $n\text{-Hx}/\text{AcOEt}/\text{NEt}_3$ ). Assignment of the isomers.
